# Supplementary material for: Examining the reach and exposure of a mobile phone-based training programme for frontline health workers (ASHAs) in 13 states across India
Source: PubMed Central journal article supplement (PMC8386225; doi:10.1136/bmjgh-2021-005299), 2021-08-24

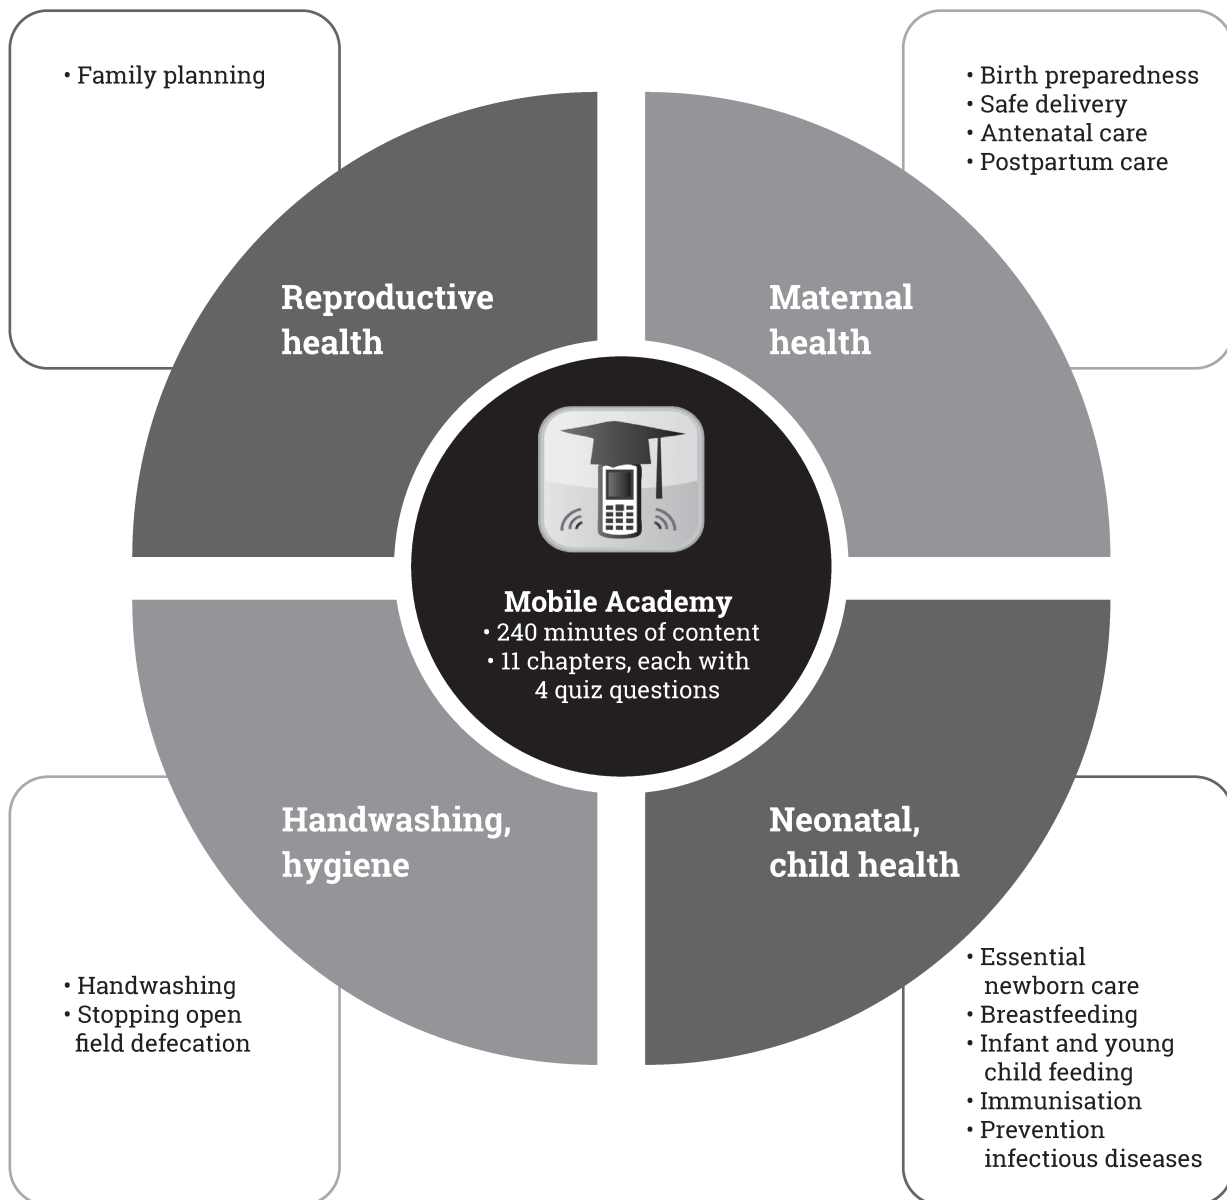

Supplement: bmjgh-2021-005299supp001.pdf [file bmjgh-2021-005299supp001.pdf]
