# Supplementary material for: Examining the reach and exposure of a mobile phone-based training programme for frontline health workers (ASHAs) in 13 states across India
Source: PubMed Central journal article supplement (PMC8386225; doi:10.1136/bmjgh-2021-005299), 2021-08-24

**Supplementary Figure 1.** Active ASHA coverage per 1000 pregnant women in rural areas of 13 India states.

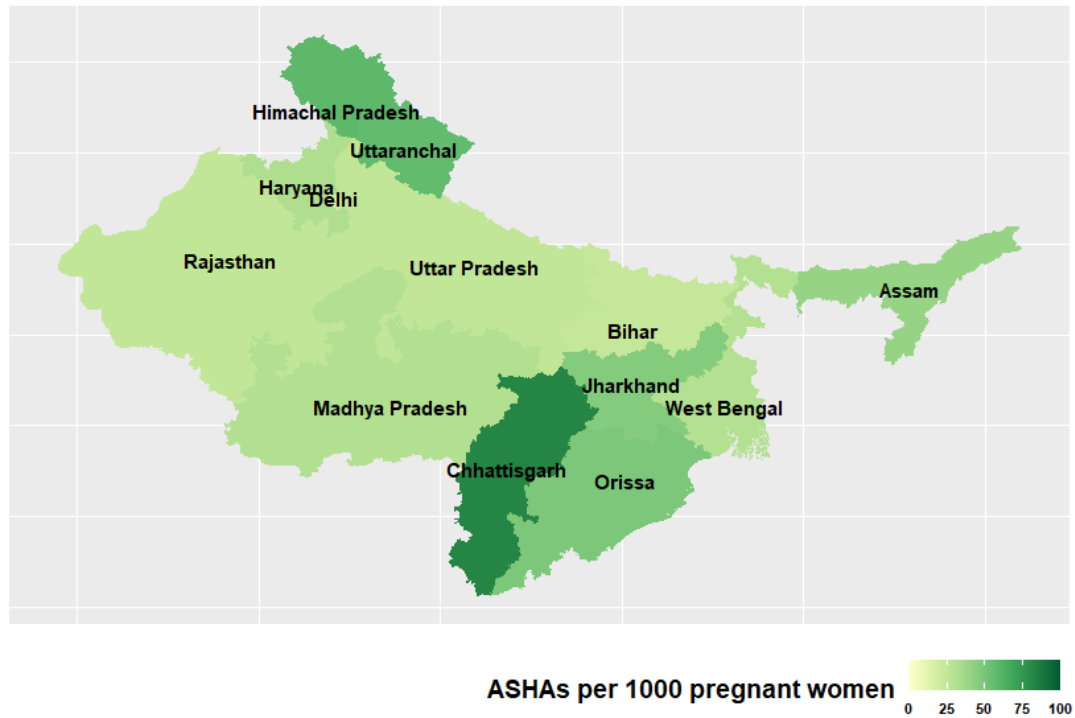

Supplement: bmjgh-2021-005299supp002.pdf [file bmjgh-2021-005299supp002.pdf]
