# Supplementary material for: Examining the reach and exposure of a mobile phone-based training programme for frontline health workers (ASHAs) in 13 states across India
Source: PubMed Central journal article supplement (PMC8386225; doi:10.1136/bmjgh-2021-005299), 2021-08-24
Supplement: bmjgh-2021-005299supp003.pdf [file bmjgh-2021-005299supp003.pdf]

Supplementary Table 1. Odds ratios of factors influencing Mobile Academy completion

|                                                   | OR   | LL   | UL   | p value | sig |
|---------------------------------------------------|------|------|------|---------|-----|
| <b>Gap between first and second call-in to MA</b> |      |      |      |         |     |
| <24 hours                                         | Ref  |      |      |         |     |
| 1-3 days                                          | 1.02 | 0.96 | 1.09 | 0.56    |     |
| 3-7 days                                          | 1.14 | 1.04 | 1.25 | 0.01    | **  |
| 1-4 weeks                                         | 1.17 | 1.07 | 1.28 | <0.001  | *** |
| >4 weeks                                          | 1.65 | 1.51 | 1.81 | <0.001  | *** |
| <b>Gap between second and third call</b>          |      |      |      |         |     |
| <24 hours                                         | Ref  |      |      |         |     |
| 1-3 days                                          | 1.12 | 1.05 | 1.19 | <0.001  | *** |
| 3-7 days                                          | 1.25 | 1.13 | 1.38 | <0.001  | *** |
| 1-4 weeks                                         | 1.38 | 1.25 | 1.53 | <0.001  | *** |
| >4 weeks                                          | 2.02 | 1.81 | 2.26 | <0.001  | *** |
| <b>Gap between third and fourth call</b>          |      |      |      |         |     |
| <24 hours                                         | Ref  |      |      |         |     |
| 1-3 days                                          | 1.16 | 1.09 | 1.24 | <0.001  | *** |
| 3-7 days                                          | 1.44 | 1.30 | 1.59 | <0.001  | *** |
| 1-4 weeks                                         | 1.71 | 1.55 | 1.90 | <0.001  | *** |
| >4 weeks                                          | 2.52 | 2.23 | 2.85 | <0.001  | *** |
| <b>Gap between fourth and fifth call</b>          |      |      |      |         |     |
| <24 hours                                         | Ref  |      |      |         |     |
| 1-3 days                                          | 1.25 | 1.18 | 1.33 | <0.001  | *** |
| 3-7 days                                          | 1.85 | 1.67 | 2.04 | <0.001  | *** |
| 1-4 weeks                                         | 2.16 | 1.95 | 2.40 | <0.001  | *** |
| >4 weeks                                          | 2.93 | 2.59 | 3.32 | <0.001  | *** |
| <b>Gap between fifth and sixth call</b>           |      |      |      |         |     |
| <24 hours                                         | Ref  |      |      |         |     |
| 1-3 days                                          | 1.23 | 1.16 | 1.31 | <0.001  | *** |
| 3-7 days                                          | 1.78 | 1.61 | 1.97 | <0.001  | *** |
| 1-4 weeks                                         | 2.24 | 2.01 | 2.48 | <0.001  | *** |
| >4 weeks                                          | 3.87 | 3.43 | 4.35 | <0.001  | *** |
| <b>Length of first call</b>                       |      |      |      |         |     |
| 0-3 mins                                          | Ref  |      |      |         |     |
| 3-10 mins                                         | 1.11 | 1.04 | 1.18 | <0.001  | **  |
| 10-30 mins                                        | 1.03 | 0.96 | 1.10 | 0.42    |     |
| 30-60 mins                                        | 0.85 | 0.78 | 0.92 | <0.001  | *** |
| >60 mins                                          | 0.59 | 0.54 | 0.65 | <0.001  | *** |
| <b>Length of second call</b>                      |      |      |      |         |     |

|                              |      |      |      |        |     |
|------------------------------|------|------|------|--------|-----|
| 0-3 mins                     | Ref  |      |      |        |     |
| 3-10 mins                    | 0.97 | 0.91 | 1.04 | 0.38   |     |
| 10-30 mins                   | 0.91 | 0.85 | 0.97 | <0.001 | **  |
| 30-60 mins                   | 0.67 | 0.62 | 0.73 | <0.001 | *** |
| >60 mins                     | 0.53 | 0.48 | 0.58 | <0.001 | *** |
| <b>Length of third call</b>  |      |      |      |        |     |
| 0-3 mins                     | Ref  |      |      |        |     |
| 3-10 mins                    | 0.91 | 0.85 | 0.98 | 0.01   | *   |
| 10-30 mins                   | 0.81 | 0.76 | 0.86 | <0.001 | *** |
| 30-60 mins                   | 0.58 | 0.54 | 0.63 | <0.001 | *** |
| >60 mins                     | 0.44 | 0.40 | 0.49 | <0.001 | *** |
| <b>Length of fourth call</b> |      |      |      |        |     |
| 0-3 mins                     | Ref  |      |      |        |     |
| 3-10 mins                    | 0.92 | 0.86 | 0.98 | 0.01   | *   |
| 10-30 mins                   | 0.80 | 0.75 | 0.85 | <0.001 | *** |
| 30-60 mins                   | 0.58 | 0.53 | 0.63 | <0.001 | *** |
| >60 mins                     | 0.43 | 0.39 | 0.47 | <0.001 | *** |
| <b>Length of fifth call</b>  |      |      |      |        |     |
| 0-3 mins                     | Ref  |      |      |        |     |
| 3-10 mins                    | 0.86 | 0.80 | 0.92 | <0.001 | *** |
| 10-30 mins                   | 0.73 | 0.69 | 0.78 | <0.001 | *** |
| 30-60 mins                   | 0.49 | 0.45 | 0.53 | <0.001 | *** |
| >60 mins                     | 0.37 | 0.33 | 0.40 | <0.001 | *** |
| <b>Weekday</b>               |      |      |      |        |     |
| Friday                       | Ref  |      |      |        |     |
| Monday                       | 0.96 | 0.88 | 1.05 | 0.35   |     |
| Tuesday                      | 1.05 | 0.96 | 1.14 | 0.29   |     |
| Wednesday                    | 1.00 | 0.92 | 1.09 | 1.00   |     |
| Thursday                     | 1.06 | 0.97 | 1.15 | 0.19   |     |
| Saturday                     | 0.99 | 0.91 | 1.08 | 0.90   |     |
| Sunday                       | 1.05 | 0.95 | 1.15 | 0.34   |     |
