# Supplementary material for: Examining the reach and exposure of a mobile phone-based training programme for frontline health workers (ASHAs) in 13 states across India
Source: PubMed Central journal article supplement (PMC8386225; doi:10.1136/bmjgh-2021-005299), 2021-08-24
Supplement: bmjgh-2021-005299supp004.pdf [file bmjgh-2021-005299supp004.pdf]

**Supplementary Table 2. Mobile Academy initiation, completion, and pass rates by State**

| State Name       | Total ASHAs | Initiated |    | Completed |    | Passed |    |
|------------------|-------------|-----------|----|-----------|----|--------|----|
|                  | N           | n         | %  | n         | %  | n      | %  |
| Assam            | 32,300      | 2,125     | 7  | 1,420     | 4  | 1,386  | 4  |
| Bihar            | 80,315      | 7,422     | 9  | 3,564     | 4  | 3,525  | 4  |
| Chhattisgarh     | 56,677      | 8,536     | 15 | 6,518     | 12 | 6,453  | 11 |
| Delhi            | 6,128       | 3,192     | 52 | 2,688     | 44 | 2,666  | 44 |
| Haryana          | 20,057      | 13,053    | 65 | 11,851    | 59 | 11,771 | 59 |
| Himachal Pradesh | 7,573       | 5,861     | 77 | 5,652     | 75 | 5,579  | 74 |
| Jharkhand        | 42,445      | 23,100    | 54 | 20,826    | 49 | 20,679 | 49 |
| Madhya Pradesh   | 72,060      | 16,414    | 23 | 12,892    | 18 | 12,870 | 18 |
| Odisha           | 45,173      | 19,547    | 43 | 13,259    | 29 | 13,062 | 29 |
| Rajasthan        | 57,567      | 37,078    | 64 | 35,076    | 61 | 35,005 | 61 |
| Uttar Pradesh    | 170,998     | 14,991    | 9  | 8,087     | 5  | 7,992  | 5  |
| Uttarakhand      | 14,470      | 6,950     | 48 | 6,230     | 43 | 6,212  | 43 |
| West Bengal      | 51,068      | 327       | 1  | 72        | 0  | 72     | 0  |
